# Supplementary material
Source: bioRxiv or medRxiv preprint supplement (https://www.biorxiv.org/highwire/filestream/19546/field_highwire_adjunct_files/2/062455-3.pdf)

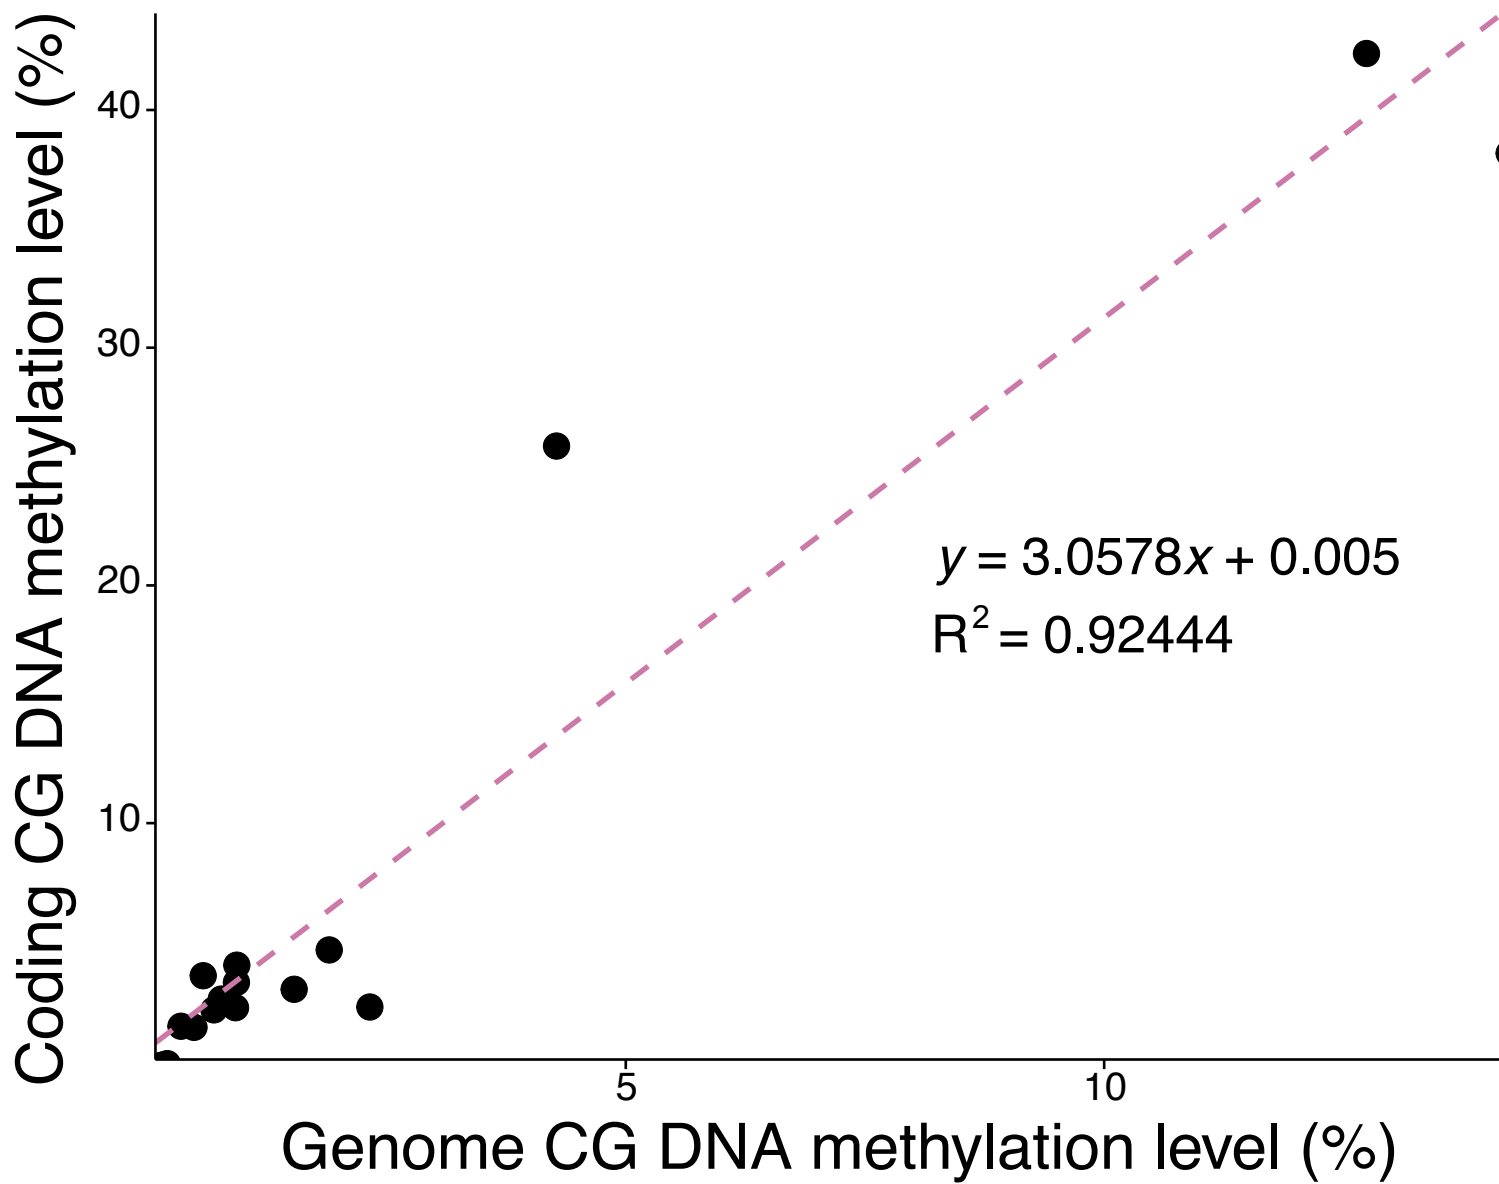

Supplement: Supplementary file [file 062455-3.pdf]
